# Supplementary material
Source: ML conference proceedings conference paper supplement (https://openaccess.thecvf.com/content/CVPR_2020/html/Lee_NeuralScale_Efficient_Scaling_CVPR_2020_paper.html)
Supplement: Supplementary file 1 [file Lee_NeuralScale_Efficient_Scaling_CVPR_2020_supplemental.pdf]

## 6. Supplementary Material

### 6.1. Update of $\tau$

To meet the memory limitation (parameter constraint) of any platform, we only need to update  $\tau$  in our approach. We show the proof of the update of  $\tau$  as follows:

$$\tau_i = \tau_{i-1} - \Delta\tau_{i-1} \quad (12)$$

$$= \tau_{i-1} - \eta \frac{\frac{\partial}{\partial \tau_{i-1}} (h(f(\mathbf{x}|\mathbf{W}, \Phi(\tau_{i-1}|\Theta))) - \hat{\tau})^2}{\partial \tau_{i-1}} \quad (13)$$

$$= \tau_{i-1} - \eta (h(f(\mathbf{x}|\mathbf{W}, \Phi(\tau_{i-1}|\Theta))) - \hat{\tau}) \quad (14)$$

$$= \tau_{i-1} - \eta \frac{\partial h(f(\mathbf{x}|\mathbf{W}, \Phi(\tau_{i-1}|\Theta)))}{\partial \Phi(\tau_{i-1}|\Theta)} \frac{\partial \Phi(\tau_{i-1}|\Theta)}{\partial \tau_{i-1}} \quad (15)$$

$$= \tau_{i-1} - \eta (h(f(\mathbf{x}|\mathbf{W}, \Phi(\tau_{i-1}|\Theta))) - \hat{\tau}) \sum_{l=1}^L \beta_l \alpha_l \tau_{i-1}^{\beta_l-1}. \quad (16)$$

Note that (15) comes from the chain rule of derivative.

### 6.2. Accuracy Comparisons

In this section we show the tabularized comparison of VGG11-CIFAR100, MobileNetV2-CIFAR100 and ResNet18-TinyImageNet which was not shown in the main paper. As shown in Table 2, an accuracy gain of 5.85%, 2.40% and 3.04% is observed for VGG11, MobileNetV2 and ResNet18 on CIFAR100, TinyImageNet and CIFAR100 respectively.

### 6.3. Pre-Training Epochs $P$

The pruning of neural network is usually done on a pre-trained network. As we want our algorithm to be efficient in terms of search cost, we explore the possibility of reduction in time or epochs for network pre-training by tuning the pre-training epochs  $P$ . To our surprise, having a large  $P$  does not result in an architecture with the best performance. Here, we investigate how  $P$  affects the accuracy of the final configuration, proving that conventional wisdom on when to apply pruning might be flawed. Experiments will be shown on VGG11 and MobileNetV2 on CIFAR10 and CIFAR100 respectively. All results shown are based on the final (iteration=15) iteration of architecture descent.

**VGG11.** CIFAR10 will be used for the experimentation on  $P$  for VGG11. We show architecture and results obtained by setting  $P$  to be 0, 2, 5, 10, 30 and 60. The searched architecture is shown in Figure 6. We next show the comparison plot using different pre-training epochs in Figure 7 accompanied by Table 3. For a simple network like VGG11, the number of pre-training epochs doesn't have too much of an impact in performance which can be clearly observed in the resulting filter configuration in Figure 6.

Table 2: Comparison of various network-dataset pairs.

| Method                             | Params | Latency | Accuracy (%)                       |
|------------------------------------|--------|---------|------------------------------------|
| <b>VGG11 CIFAR100</b>              |        |         |                                    |
| Uniform Scale<br>(Baseline)        | 0.59M  | 1.30ms  | 60.22 $\pm$ 0.45                   |
|                                    | 5.23M  | 4.28ms  | 68.56 $\pm$ 0.21                   |
|                                    | 36.99M | 18.83ms | 71.94 $\pm$ 0.25                   |
| Li <i>et al.</i> [29] <sup>†</sup> | 5.23M  | 4.77ms  | 68.41 $\pm$ 0.09                   |
| MorphNet [12]<br>(Taylor-FO [35])  | 0.59M  | 1.78ms  | 64.85 $\pm$ 0.17                   |
|                                    | 5.21M  | 7.18ms  | 70.64 $\pm$ 0.38                   |
|                                    | 36.80M | 41.52ms | 72.72 $\pm$ 0.09                   |
| NeuralScale<br>(Iteration = 1)     | 0.59M  | 1.95ms  | 65.71 $\pm$ 0.28                   |
|                                    | 5.23M  | 7.36ms  | 70.50 $\pm$ 0.16                   |
|                                    | 36.98M | 33.24ms | <b>72.78 <math>\pm</math> 0.19</b> |
| NeuralScale<br>(Iteration = 15)    | 0.59M  | 2.52ms  | <b>66.07 <math>\pm</math> 0.21</b> |
|                                    | 5.23M  | 10.19ms | <b>70.70 <math>\pm</math> 0.45</b> |
|                                    | 36.98M | 43.95ms | <b>72.78 <math>\pm</math> 0.13</b> |
| <b>MobileNetV2 TinyImageNet</b>    |        |         |                                    |
| Uniform Scale<br>(Baseline)        | 0.23   | 8.53ms  | 44.22 $\pm$ 0.40                   |
|                                    | 1.52M  | 18.87ms | 54.63 $\pm$ 0.46                   |
| Li <i>et al.</i> [29] <sup>†</sup> | 1.52M  | 18.76ms | 52.71 $\pm$ 0.28                   |
| MorphNet [12]<br>(Taylor-FO [35])  | 0.23M  | 10.47ms | 44.53 $\pm$ 0.50                   |
|                                    | 1.51M  | 28.88ms | 53.08 $\pm$ 0.52                   |
| NeuralScale<br>(Iteration = 1)     | 0.22M  | 14.96ms | <b>49.70 <math>\pm</math> 0.73</b> |
|                                    | 1.49M  | 26.98ms | 54.18 $\pm$ 0.57                   |
| NeuralScale<br>(Iteration = 15)    | 0.22M  | 17.16ms | 46.82 $\pm$ 0.89                   |
|                                    | 1.49M  | 41.20ms | <b>55.42 <math>\pm</math> 0.44</b> |
| <b>ResNet18 CIFAR100</b>           |        |         |                                    |
| Uniform Scale<br>(Baseline)        | 0.71M  | 2.53ms  | 68.10 $\pm$ 0.40                   |
|                                    | 6.32M  | 9.98ms  | 75.10 $\pm$ 0.34                   |
|                                    | 44.75M | 47.04ms | 78.39 $\pm$ 0.29                   |
| Li <i>et al.</i> [29] <sup>†</sup> | 6.32M  | 10.18ms | 73.91 $\pm$ 0.12                   |
| MorphNet [12]<br>(Taylor-FO [35])  | 0.72M  | 3.73ms  | 69.34 $\pm$ 0.31                   |
|                                    | 6.29M  | 15.03ms | 75.60 $\pm$ 0.40                   |
|                                    | 44.53M | 98.54ms | <b>78.68 <math>\pm</math> 0.17</b> |
| NeuralScale<br>(Iteration = 1)     | 0.71M  | 4.51ms  | 70.63 $\pm$ 0.13                   |
|                                    | 6.38M  | 11.95ms | 75.83 $\pm$ 0.15                   |
|                                    | 45.15M | 50.24ms | 78.39 $\pm$ 0.22                   |
| NeuralScale<br>(Iteration = 15)    | 0.71M  | 5.71ms  | <b>71.14 <math>\pm</math> 0.45</b> |
|                                    | 6.36M  | 19.54ms | <b>76.35 <math>\pm</math> 0.20</b> |
|                                    | 45.05M | 90.18ms | 78.62 $\pm$ 0.13                   |

<sup>†</sup> Fine-tuned using pre-trained network (not trained from scratch).

**MobileNetV2.** CIFAR100 will be used for the experimentation on  $P$  for MobileNetV2. We show architecture and results obtained by setting  $P$  to be 0, 2, 5, 10, 30 and

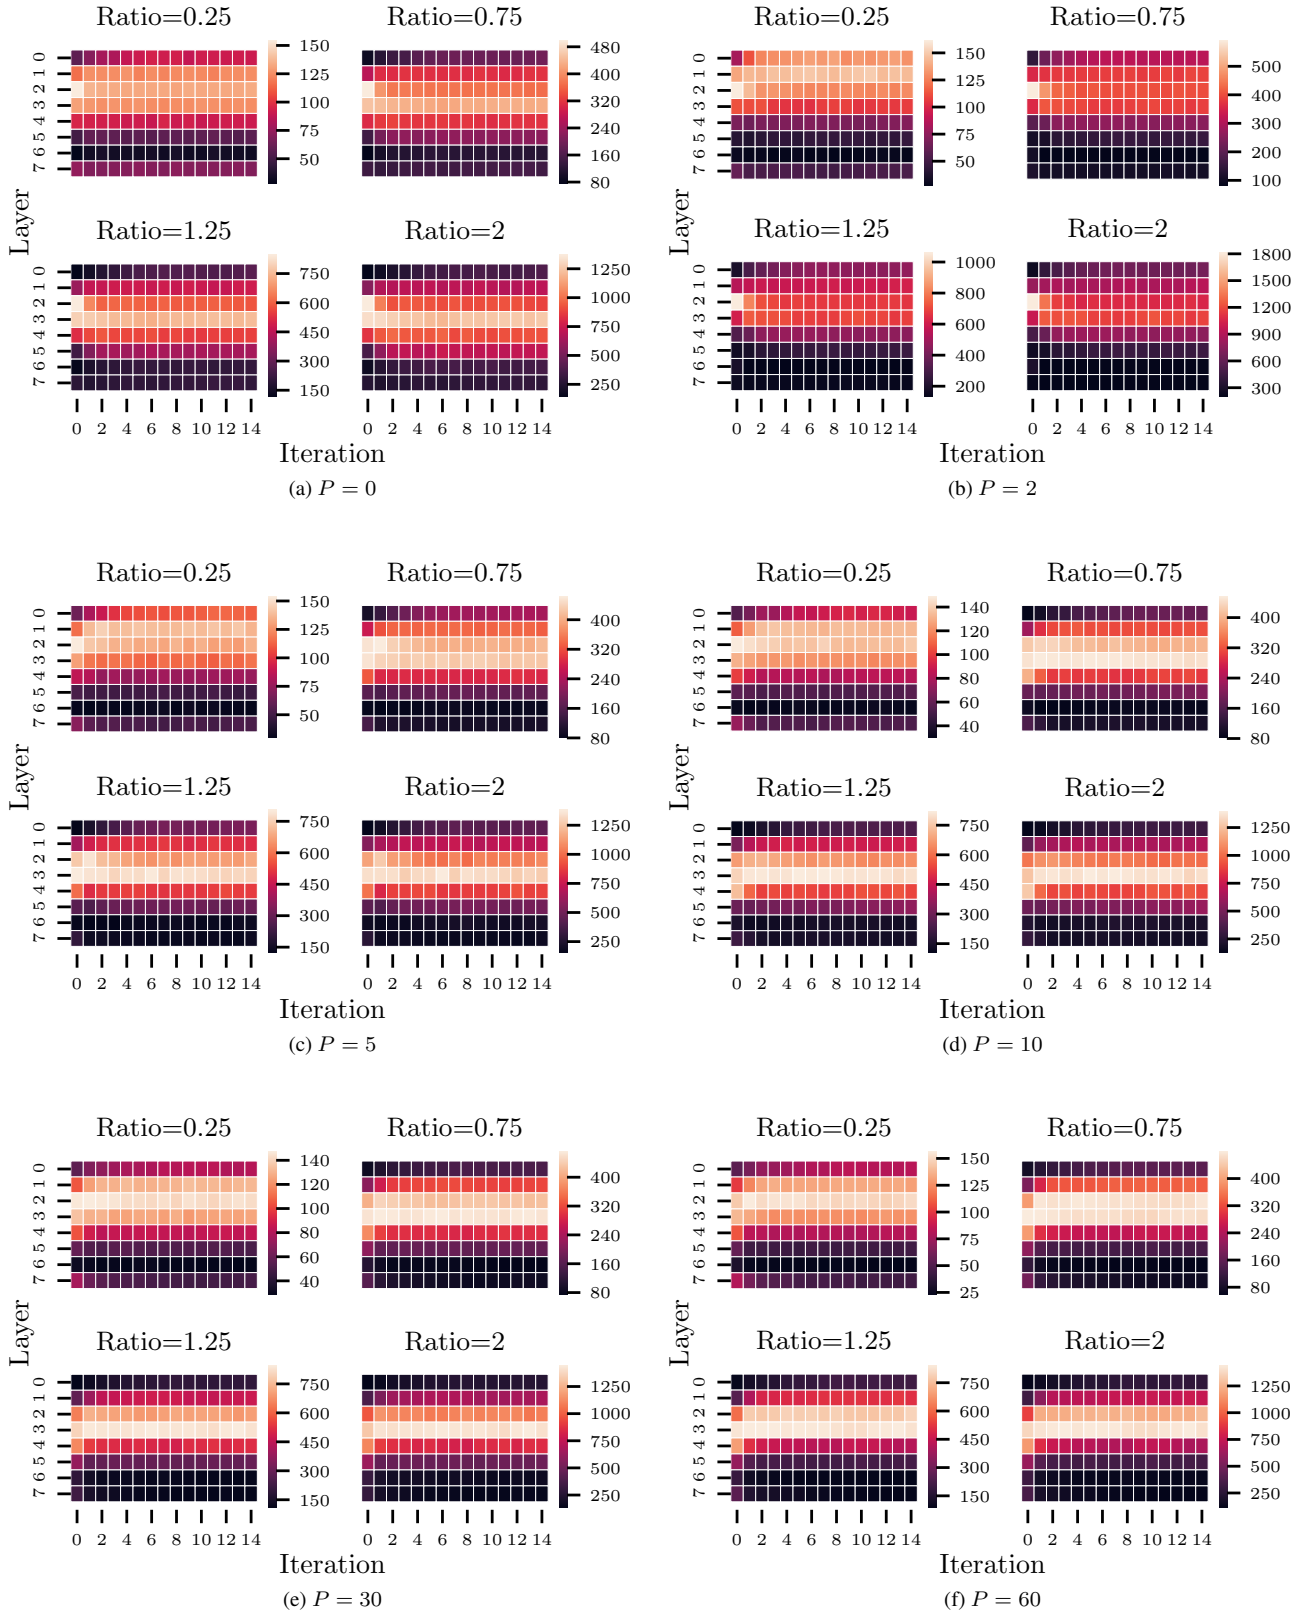

Figure 6: Showing the difference in searched architecture by running architecture descent on VGG11 for CIFAR10 using various value of pre-training epochs  $P$ .

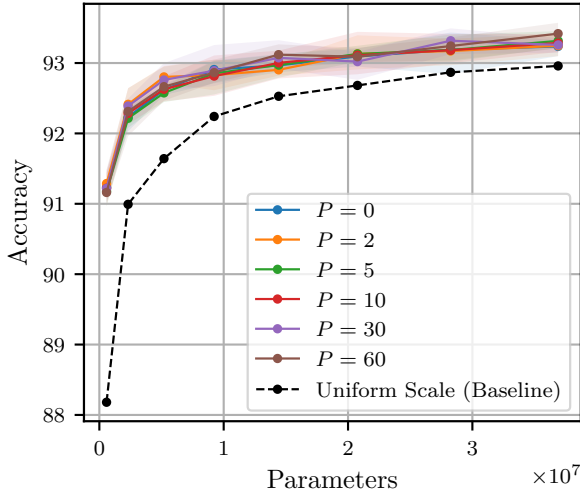

(a) Accuracy vs Parameter.

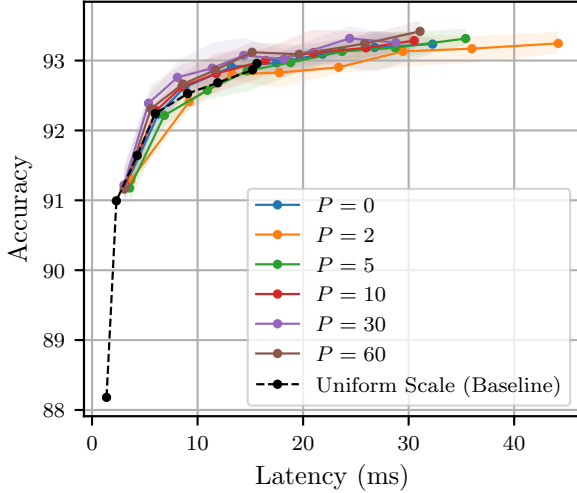

(b) Accuracy vs Latency.

Figure 7: Accuracy comparison plot for VGG11 on CIFAR10 that uses different pre-training epochs  $P$  before pruning. (a) shows the accuracy comparison under different parameters using different value of  $P$ . (b) shows the comparison of accuracy under different latencies using different value of  $P$ .

60. The searched architecture is shown in Figure 8. We next show the comparison plot using different pre-training epochs in Figure 9 accompanied by Table 4. It is interesting to see that for a deeper and more complicated network like MobileNetV2, there’s a notable variation in the distribution of filters with respect to the number of pre-training epochs. The accuracy comparison in Figure 9 shows that

Table 3: Accuracy comparison on VGG11 for CIFAR10 using different pre-training epochs  $P$ .

| Method                      | Params | Latency | Accuracy (%)                       |
|-----------------------------|--------|---------|------------------------------------|
| Uniform Scale<br>(Baseline) | 0.58M  | 1.30ms  | $88.18 \pm 0.16$                   |
|                             | 5.20M  | 4.31ms  | $91.64 \pm 0.10$                   |
|                             | 36.89M | 19.50ms | $92.96 \pm 0.09$                   |
| NeuralScale<br>( $P = 0$ )  | 0.58M  | 3.01ms  | $91.23 \pm 0.05$                   |
|                             | 5.20M  | 12.35ms | $92.62 \pm 0.06$                   |
|                             | 36.89M | 53.26ms | $93.24 \pm 0.09$                   |
| NeuralScale<br>( $P = 2$ )  | 0.58M  | 3.49ms  | <b><math>91.29 \pm 0.09</math></b> |
|                             | 5.20M  | 20.24ms | <b><math>92.80 \pm 0.09</math></b> |
|                             | 36.90M | 81.27ms | $93.25 \pm 0.10$                   |
| NeuralScale<br>( $P = 5$ )  | 0.58M  | 3.34ms  | $91.18 \pm 0.13$                   |
|                             | 5.19M  | 17.30ms | $92.58 \pm 0.08$                   |
|                             | 36.90M | 63.85ms | $93.31 \pm 0.08$                   |
| NeuralScale<br>( $P = 10$ ) | 0.58M  | 2.93ms  | $91.22 \pm 0.15$                   |
|                             | 5.20M  | 12.53ms | $92.63 \pm 0.12$                   |
|                             | 36.90M | 55.44ms | $93.29 \pm 0.09$                   |
| NeuralScale<br>( $P = 30$ ) | 0.58M  | 2.82ms  | $91.22 \pm 0.15$                   |
|                             | 5.20M  | 11.85ms | $92.76 \pm 0.13$                   |
|                             | 36.90M | 51.02ms | $93.26 \pm 0.08$                   |
| NeuralScale<br>( $P = 60$ ) | 0.58M  | 2.85ms  | $91.16 \pm 0.17$                   |
|                             | 5.20M  | 12.58ms | $92.66 \pm 0.18$                   |
|                             | 36.89M | 61.14ms | <b><math>93.42 \pm 0.13</math></b> |

having large number of pre-training epochs doesn’t help the efficiency in parameters and instead impedes it. It is shown that  $P = 2$  or  $P = 5$  gives us a configuration of filters that is the most efficient in terms of parameters for MobileNetV2 on CIFAR100. This is an interesting observation which sheds light on the number of pre-training iterations required prior to network pruning for optimal performance.

#### 6.4. Using Convolutional Layers as Shortcut Connection

By default, MobileNetV2 has shortcut connections composed of identity mappings. By modifying the filter sizes of MobileNetV2, the shortcut connection has to be changed to a convolutional one instead to compensate the difference in filter sizes on both ends of the shortcut connection. A surprising finding is that the change from identity mapping to convolutional mapping affects the original performance significantly, despite the increase in parameter. We show experiments comparing two kinds of shortcut connection (identity and convolutional) on the original configuration which is uniformly scaled to different ratios. We name the method that uses convolutional shortcuts as *ConvCut*. A comparison plot comparing ConvCut with other scaling

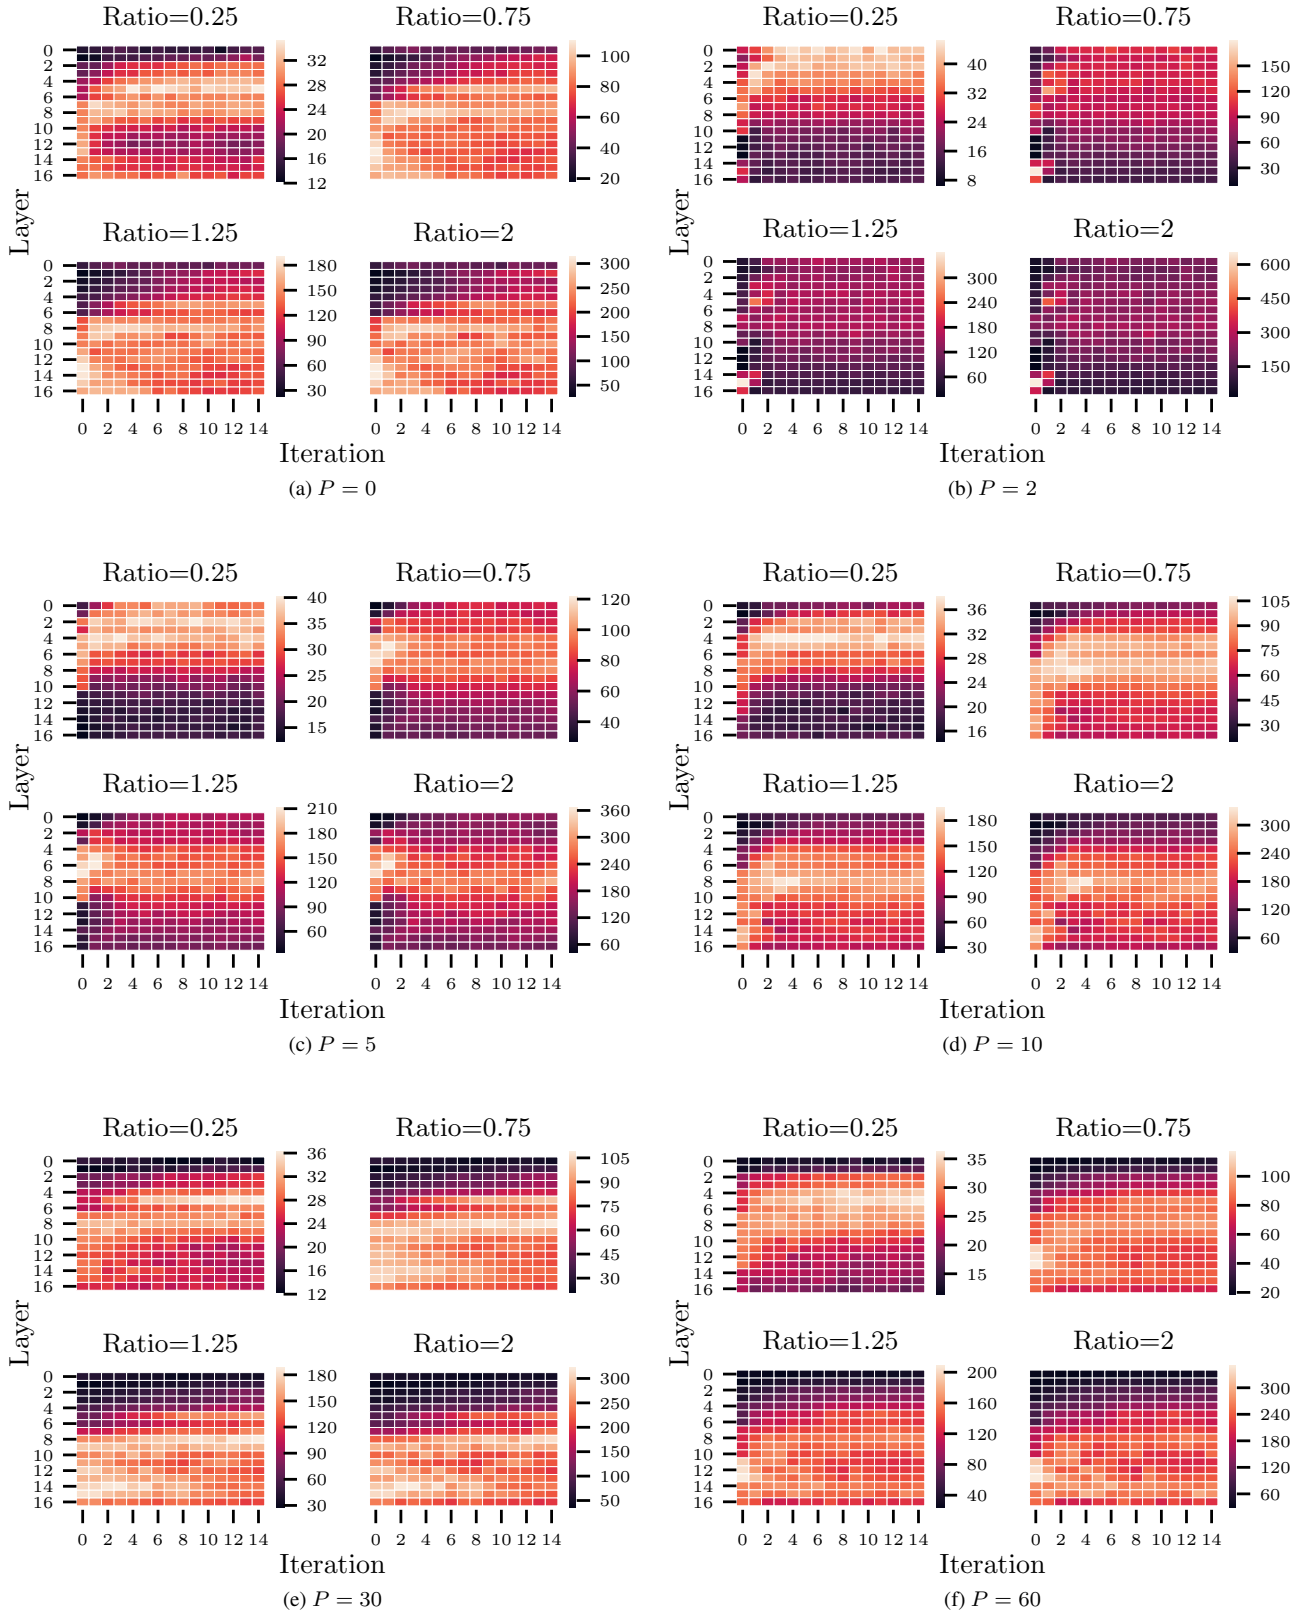

Figure 8: Showing the difference in searched architecture by running architecture descent on MobileNetV2 for CIFAR100 using various value of pre-training epochs  $P$ .

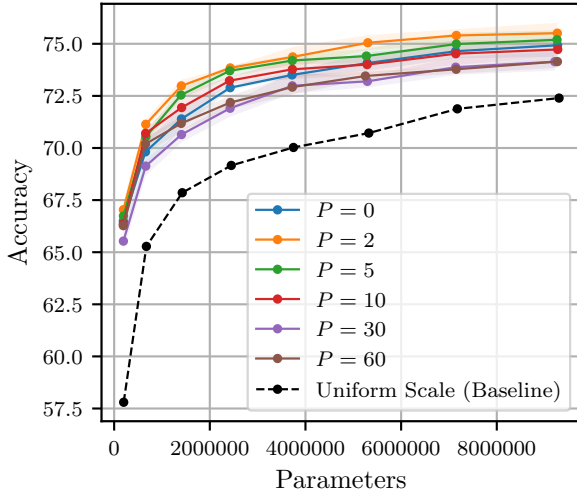

(a) Accuracy vs Parameters.

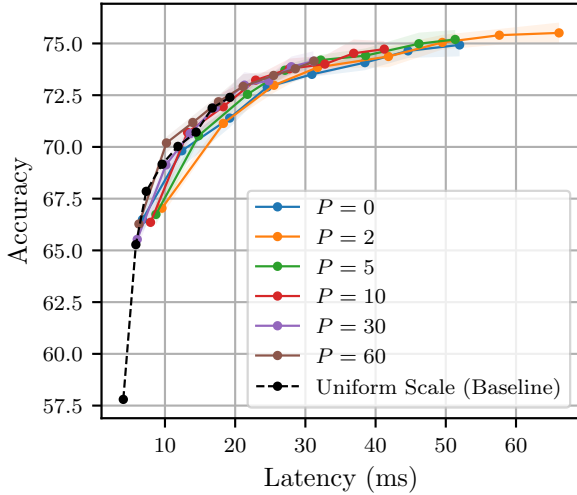

(b) Accuracy vs Latency.

Figure 9: Accuracy comparison plot for MobileNetV2 on CIFAR100 that uses different pre-training epochs  $P$  before pruning. (a) shows the accuracy comparison under different parameters using different value of  $P$ . (b) shows the comparison of accuracy under different latencies using different value of  $P$ .

methods using ResNet18 and MobileNetV2 on TinyImageNet is shown in Figure 10 and 11 respectively. Results are summarized in Table 6 and Table 5 for ResNet18 and MobileNetV2 respectively. It can be observed that the switch from identity to convolutional mapping doesn't have drastic impact on the accuracy of ResNet18 but a significant drop in accuracy can be observed for MobileNetV2. Our conjecture

Table 4: Accuracy comparison on MobileNetV2 for CIFAR100 using different pre-training epochs  $P$ .

| Method                      | Params | Latency | Accuracy (%)                       |
|-----------------------------|--------|---------|------------------------------------|
| Uniform Scale<br>(Baseline) | 0.20M  | 5.53ms  | $57.80 \pm 0.31$                   |
|                             | 1.42M  | 7.56ms  | $67.85 \pm 0.38$                   |
|                             | 9.30M  | 20.43ms | $72.40 \pm 0.22$                   |
| NeuralScale<br>( $P = 0$ )  | 0.19M  | 6.64ms  | $66.49 \pm 0.43$                   |
|                             | 1.40M  | 18.77ms | $71.39 \pm 0.45$                   |
|                             | 9.27M  | 52.49ms | $74.93 \pm 0.34$                   |
| NeuralScale<br>( $P = 2$ )  | 0.19M  | 9.42ms  | <b><math>67.04 \pm 0.28</math></b> |
|                             | 1.40M  | 24.95ms | <b><math>72.98 \pm 0.26</math></b> |
|                             | 9.27M  | 67.55ms | <b><math>75.51 \pm 0.41</math></b> |
| NeuralScale<br>( $P = 5$ )  | 0.19M  | 8.61ms  | $66.74 \pm 0.39$                   |
|                             | 1.40M  | 21.37ms | $72.54 \pm 0.18$                   |
|                             | 9.26M  | 51.63ms | $75.19 \pm 0.26$                   |
| NeuralScale<br>( $P = 10$ ) | 0.19M  | 7.82ms  | $66.36 \pm 0.28$                   |
|                             | 1.41M  | 18.02ms | $71.94 \pm 0.45$                   |
|                             | 9.27M  | 43.00ms | $74.73 \pm 0.26$                   |
| NeuralScale<br>( $P = 30$ ) | 0.19M  | 6.20ms  | $65.53 \pm 0.31$                   |
|                             | 1.41M  | 13.35ms | $70.64 \pm 0.23$                   |
|                             | 9.21M  | 31.77ms | $74.14 \pm 0.35$                   |
| NeuralScale<br>( $P = 60$ ) | 0.19M  | 6.15ms  | $66.28 \pm 0.13$                   |
|                             | 1.40M  | 13.74ms | $71.18 \pm 0.24$                   |
|                             | 9.27M  | 32.15ms | $74.15 \pm 0.18$                   |

is that the design of linear bottleneck layers in MobileNetV2 is to embed a low-dimensional manifold where switching from identity to convolutional mapping for shortcut layer that connects linear bottleneck layers introduces noise to this manifold which is harmful for information propagation and network training. Despite from the setback of accuracy drop through the introduction of convolutional shortcut layers, our approach is still able to induce accuracy gain in a low parameter count setting when compared to the baseline configuration setting, showing the importance of searching for the optimal configuration of filters. An unbiased comparison is to compare our approach with the convolutional shortcut (ConvCut) version of MobileNetV2 using the default set of filter configuration as shown in Figure 10 where both (ours and ConvCut) use convolutional layer as shortcut connection. On an apple-to-apple comparison, our approach shows superiority in parameter efficiency. This empirical study also explains the superiority in accuracy of iteration 1 when compared to iteration 15 of our approach as can be observed in Figure 10a. From our observation, iteration 1 of our approach generates a configuration composed repeated filters on some blocks, resulting in an architecture consisting of both identity and convolutional shortcut con-

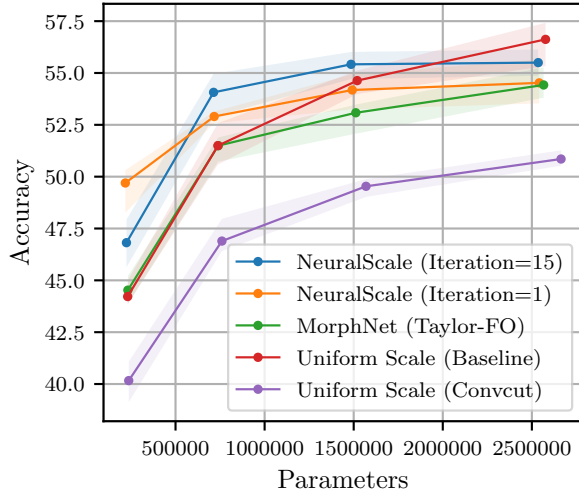

(a) Accuracy vs Parameter.

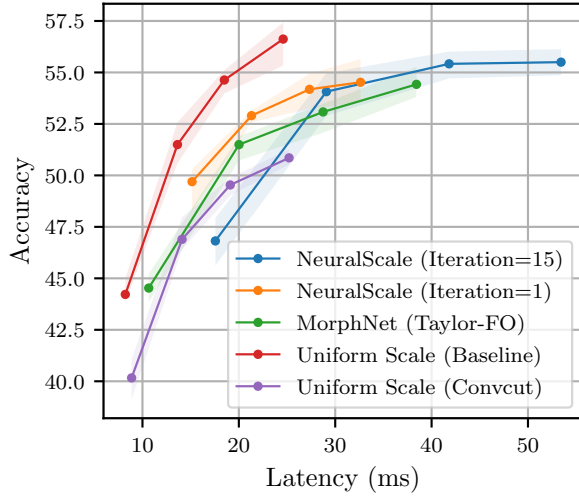

(b) Accuracy vs Latency.

Figure 10: Accuracy comparison plot for MobileNetV2 on TinyImageNet with inclusion of ConvCut.

nection. Hence, it is not surprising that iteration 1 outperforms iteration 15 of our approach as it has both traits: identity shortcut and optimized filter configuration.

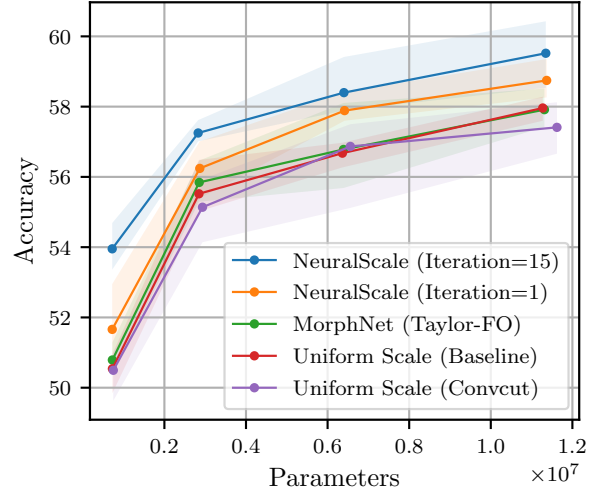

(a) Accuracy vs Parameter.

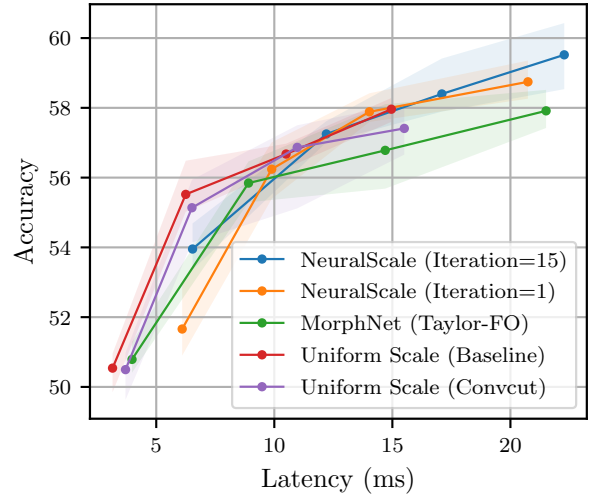

(b) Accuracy vs Latency.

Figure 11: Accuracy comparison plot for ResNet18 on TinyImageNet with inclusion of ConvCut.

Table 5: Accuracy comparison on MobileNetV2 on Tiny-ImageNet (includes ConvCut).

| Method                            | Params | Latency | Accuracy (%)                       |
|-----------------------------------|--------|---------|------------------------------------|
| Uniform Scale<br>(Baseline)       | 0.23M  | 8.53ms  | $44.22 \pm 0.40$                   |
|                                   | 1.52M  | 18.87ms | $54.63 \pm 0.46$                   |
|                                   | 2.58M  | 24.70ms | <b><math>56.62 \pm 0.70</math></b> |
| MorphNet [12]<br>(Taylor-FO [35]) | 0.23M  | 10.47ms | $44.53 \pm 0.50$                   |
|                                   | 1.51M  | 28.88ms | $53.08 \pm 0.52$                   |
|                                   | 2.57M  | 38.45ms | $54.42 \pm 0.53$                   |
| Uniform Scale<br>(ConvCut)        | 0.24M  | 9.23ms  | $40.16 \pm 0.63$                   |
|                                   | 1.57M  | 19.23ms | $49.54 \pm 0.30$                   |
|                                   | 2.66M  | 25.39ms | $50.85 \pm 0.27$                   |
| NeuralScale<br>(Iteration = 1)    | 0.22M  | 14.96ms | <b><math>49.70 \pm 0.73</math></b> |
|                                   | 1.49M  | 26.98ms | $54.18 \pm 0.57$                   |
|                                   | 2.54M  | 32.09ms | $54.52 \pm 0.72$                   |
| NeuralScale<br>(Iteration = 15)   | 0.22M  | 17.16ms | $46.82 \pm 0.89$                   |
|                                   | 1.49M  | 41.20ms | <b><math>55.42 \pm 0.44</math></b> |
|                                   | 2.54M  | 52.76ms | $55.50 \pm 0.51$                   |

Table 6: Accuracy comparison on ResNet18 on TinyImageNet (includes ConvCut).

| Method                            | Params | Latency | Accuracy (%)                       |
|-----------------------------------|--------|---------|------------------------------------|
| Uniform Scale<br>(Baseline)       | 0.73M  | 3.02ms  | $50.54 \pm 0.37$                   |
|                                   | 6.36M  | 11.56ms | $56.68 \pm 0.28$                   |
|                                   | 11.27M | 15.46ms | $57.96 \pm 0.23$                   |
| MorphNet [12]<br>(Taylor-FO [35]) | 0.72M  | 3.80ms  | $50.79 \pm 0.38$                   |
|                                   | 6.39M  | 14.83ms | $56.78 \pm 0.85$                   |
|                                   | 11.31M | 22.07ms | $57.91 \pm 0.38$                   |
| Uniform Scale<br>(ConvCut)        | 0.75M  | 3.64ms  | $50.50 \pm 0.46$                   |
|                                   | 6.56M  | 11.99ms | $56.87 \pm 0.88$                   |
|                                   | 11.62M | 15.98ms | $57.41 \pm 0.58$                   |
| NeuralScale<br>(Iteration = 1)    | 0.72M  | 5.96ms  | $51.66 \pm 0.80$                   |
|                                   | 6.42M  | 14.58ms | $57.89 \pm 0.28$                   |
|                                   | 11.37M | 22.11ms | $58.75 \pm 0.37$                   |
| NeuralScale<br>(Iteration = 15)   | 0.72M  | 6.42ms  | <b><math>53.95 \pm 0.53</math></b> |
|                                   | 6.40M  | 17.52ms | <b><math>58.40 \pm 0.54</math></b> |
|                                   | 11.35M | 25.94ms | <b><math>59.52 \pm 0.63</math></b> |
